# Supplementary material for: Phenolic Release during In Vitro Digestion of Cold and Hot Extruded Noodles Supplemented with Starch and Phenolic Extracts
Source: MDPI journal article supplement (doi:10.3390/nu14183864), 2022-09-18
Supplement: s1 [file s1]

*Supplementary Materials*

# Phenolic Release during In Vitro Digestion of Cold and Hot Extruded Noodles Supplemented with Starch and Phenolic Extracts

Ruibin Wang <sup>1,2,3</sup>, Ming Li <sup>1,†</sup>, Margaret Anne Brennan <sup>2</sup>, Don Kulasiri <sup>2</sup>, Boli Guo <sup>1,\*</sup>  
and Charles Stephen Brennan <sup>3,4,\*</sup>

<sup>1</sup> Key Laboratory of Agro-Products Processing, Institute of Food Science and Technology, Chinese Academy of Agriculture Sciences, Ministry of Agriculture and Rural Affairs, Beijing 100193, China

<sup>2</sup> Department of Wine, Food and Molecular Biosciences, Faculty of Agriculture & Life Sciences, Lincoln University, Lincoln 7647, New Zealand

<sup>3</sup> Riddet Institute, Massey University, Palmerston North 4474, New Zealand

<sup>4</sup> School of Science, Royal Melbourne Institute of Technology University, Melbourne, VIC 3000, Australia

\* Correspondence: guoboli@caas.cn (B.G.); charles.brennan@rmit.edu.au (C.S.B.)

† These authors contributed equally to this work.

## Supplementary information

Table S1. Phenolic content and main profiles of native starch and phenolic extracts.

| Materials | Phenolic content (mg GAE·g DW <sup>-1</sup> ) |               |               | Main phenolic profiles in unbound phenolic extract (mg/100g) |          |           |
|-----------|-----------------------------------------------|---------------|---------------|--------------------------------------------------------------|----------|-----------|
|           | UPC                                           | BPC           | TPC           | Rutin                                                        | Vitexin  | Hyperin   |
| Starch    | 0.463 ± 0.039                                 | 0.160 ± 0.013 | 0.623 ± 0.045 | 0.139 ± 0.001                                                | n.d.     | n.d.      |
| Phenolics | 284 ± 13                                      | n.d.          | 284 ± 13      | 1674 ± 24                                                    | 528 ± 74 | 1114 ± 28 |

UPC, BPC and TPC, unbound, bound and total phenolic content, respectively; n.d., not detected.

**Table S2.** Predominant phenolic profiles in buckwheat hull extract determined by a liquid chromatography electrospray ionization mass spectrometry (LC-ESI-MS).

| Profile            | Molecular formula                               | Selected ion       | m/z       | MS2                                        |
|--------------------|-------------------------------------------------|--------------------|-----------|--------------------------------------------|
| Vitexin/isovitexin | C <sub>21</sub> H <sub>19</sub> O <sub>10</sub> | [M-H] <sup>-</sup> | 431.09848 | 311.05634; 283.06128;                      |
| Hyperin            | C <sub>21</sub> H <sub>19</sub> O <sub>12</sub> | [M-H] <sup>-</sup> | 463.08884 | 300.02768; 271.02496; 151.00244; 178.99753 |
| Rutin              | C <sub>27</sub> H <sub>29</sub> O <sub>16</sub> | [M-H] <sup>-</sup> | 609.12692 | 300.03;151.00;179.00;                      |

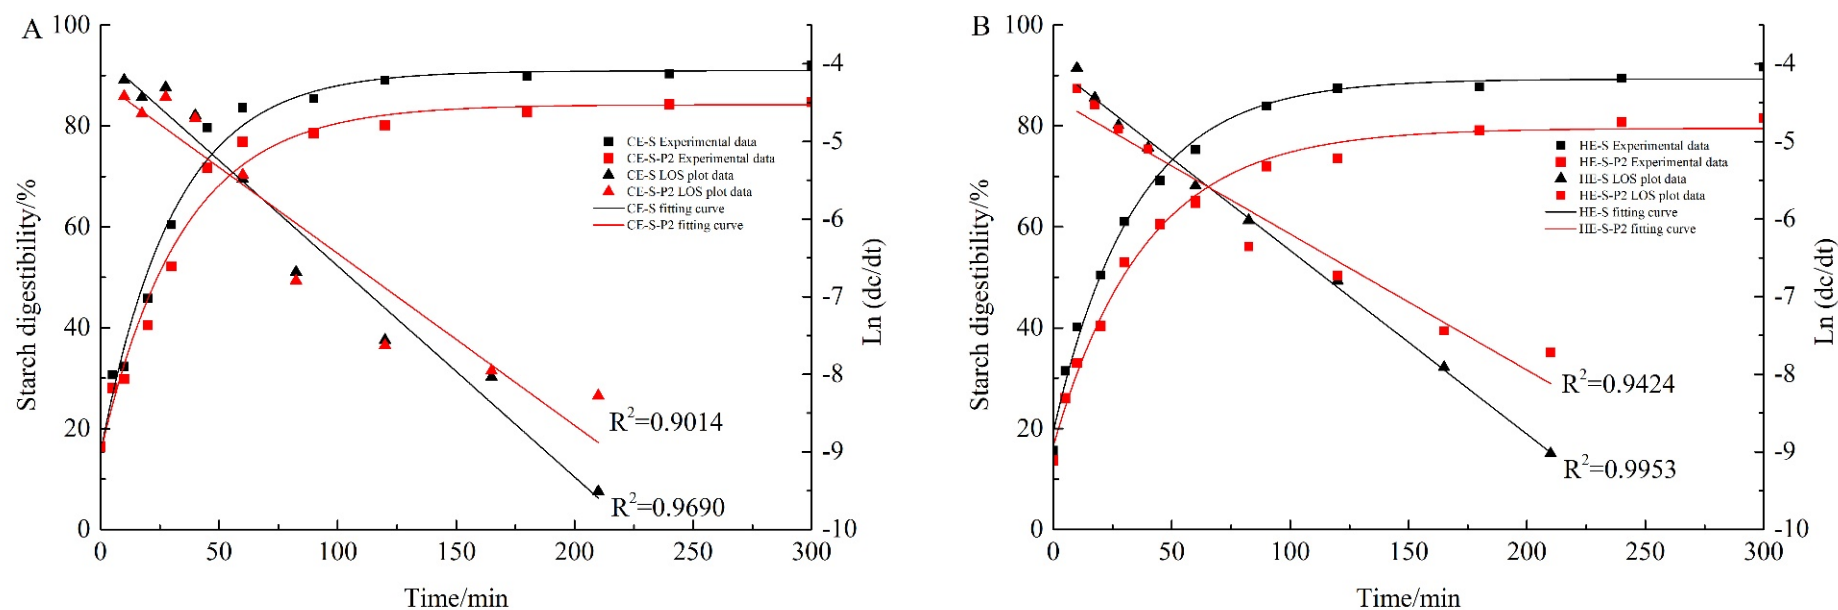

**Figure S1.** *In vitro* digestion curve of CE (A) and HE (B) starch noodles in the absence or presence of phenolics. CE-S, cold extruded noodles with starch only; CE-S-P2, cold extruded noodles with starch and phenolics (2.0%); HE-S, hold extruded noodles with starch only; HE-S-P2, hold extruded noodles with starch and phenolics (2.0%).

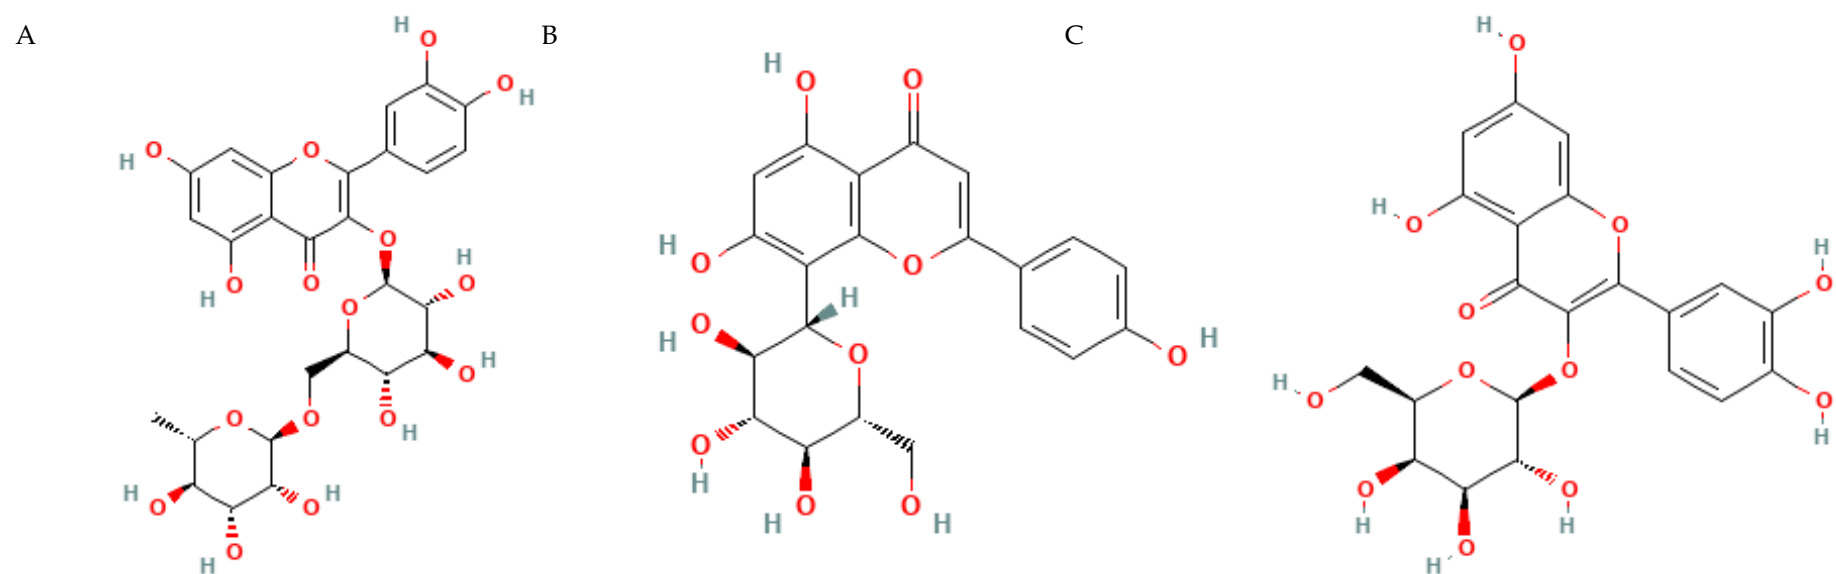

**Figure S2.** Structure of rutin (A), vitexin (B), and hyperin (C) downloaded from PubChem (<https://pubchem.ncbi.nlm.nih.gov/>).
